# Supplementary material for: A Physical Interaction between the Dopamine Transporter and DJ-1 Facilitates Increased Dopamine Reuptake
Source: PubMed Central journal article supplement (PMC4549284; doi:10.1371/journal.pone.0136641), 2015-08-25
Supplement: pone.0136641.s003.pdf [file pone.0136641.s003.pdf]

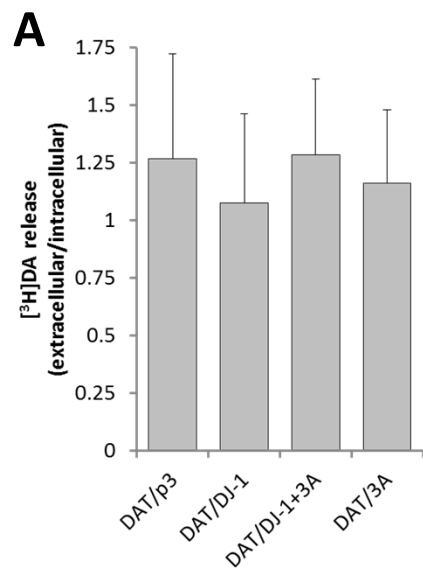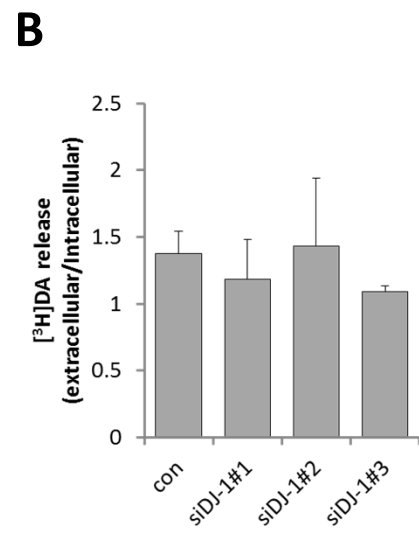

Figure S3
